# Supplementary material for: Hybrid fusions show that inter-monomer electron transfer robustly supports cytochrome bc1 function in vivo
Source: PubMed Central journal article supplement — Biochem Biophys Res Commun. 2014 Aug 22;451(2):270–5. doi: 10.1016/j.bbrc.2014.07.117 (PMC4152375; doi:10.1016/j.bbrc.2014.07.117), 2014-08-22
Supplement: mmc1.pdf [file mmc1.pdf]

## Supplementary material to:

Hybrid fusions show that inter-monomer electron transfer robustly supports cytochrome  $bc_1$  function in vivo.

Robert Ekiert, Monika Czapla, Marcin Sarewicz and Artur Osyczka

## Materials and methods

### *Construction of mutants*

In the present work plasmid pMTS1 [1] (carries a *petABC* operon coding for three subunits of *R. capsulatus* cytochrome  $bc_1$ ) and its derivatives were used as the expression vectors. The plasmid pMTS1-BS [2] was used for expression of hybrid  $B_S B_S$  complex (cytochrome  $bc_1$  containing cytochrome  $c_1$  and FeS subunits from *R. capsulatus* and cytochrome  $b$  from *R. sphaeroides*) and plasmid pMTS1-BSBST [2] – for expression of hybrid fusion  $B_S$ -B complex (cytochrome  $bc_1$ -like complex in which two separate cytochrome  $b$  subunits in the dimer were replaced with a hybrid cytochrome  $b_S b$  built of *R. sphaeroides* and *R. capsulatus* cytochromes  $b$  fused together).

The mutated derivatives of pMTS1-BS and pMTS1-BSBST were created following general strategies described in [2]. Specifically, to create derivatives of pMTS1-BS, the desired point mutations (H212N, H217W and H212N/H217W in cytochrome  $b$  gene) were first introduced into pPET1-BS plasmid using PCR-based QuikChange Site-directed Mutagenesis (Stratagene) and oligonucleotide primers pairs listed in Table 1. Subsequently, the appropriate fragments of mutated pPET1-BS plasmids were cloned to expression vector pMTS1 as described in [2]. The so constructed derivatives of pMTS1-BS were used to express  $^N B_S B_S^N$ ,  $^W B_S B_S^W$ , and  $^{N/W} B_S B_S^{N/W}$  complexes.

**Table 1. Oligonucleotide primers used for mutagenesis and PCR.**

| Name of the primer | 5' - 3' DNA sequence             |
|--------------------|----------------------------------|
| S_H212N_F          | CTCGTGGCCATCAACATCTGGGCCTTCC     |
| S_H212N_R          | GAAGGCCCAGATGTTGATGGCCACGAGGGC   |
| S_H217W_F          | CATCTGGGCCTTCTGGTCGACGGGCAACAAC  |
| S_H217W_R          | GTTGCCCGTTCGACCAGAAGGCCCAGATGTGG |
| SW_H212N_F         | CTCGTGGCCATCAACATCTGGGCCTTCTGG   |
| SW_H212N_R         | CAGAAGGCCCAGATGTTGATGGCCACGAGGG  |
| H217W_F            | CATCTGGGCCTTCTGGACCACCGGCAACAAC  |
| H217W_R            | GTTGCCCGTGGTCCAGAAGGCCCAGATGTGG  |

“S” in the name of the primer denotes sequence designed to bind to *R. sphaeroides* cytochrome *b* gene; “SW” indicates primers designed to bind to *R. sphaeroides* cytochrome *b* gene with H217W mutation. Remaining primers bind to *R. capsulatus* genes. The mutated triplets are italicized.

To create derivatives of pMTS1-BSBST that were used to express  $^W B_S-B^W$ ,  $^W B_S-B_W$  and  $^{N/W} B_S-B_W$  the desired mutations were first introduced into genes for *R. sphaeroides* cytochrome *b* on pPET1-BS-Not or for *R. capsulatus* cytochrome *b* on pUC-BLST plasmids using QuikChange Site-directed Mutagenesis and oligonucleotide primers pairs (Table 1). The mutated genes were assembled in appropriate combinations using cloning strategy described in [2]. All newly constructed expression vectors were introduced to *R. capsulatus* MT-RBC1 via triparental crosses as described in [1]. Construction of other mutants used in this work was described in [2]. DNA sequence and correct size of all constructs were verified both at the stage of preparing the constructs and after re-isolation of plasmids from *R. capsulatus* strains.

## References

- [1] E. Atta-Asafo-Adjei, F. Daldal, Size of the amino acid side chain at position 158 of cytochrome *b* is critical for an active cytochrome *bc*<sub>1</sub> complex and for photosynthetic growth of *Rhodobacter capsulatus*, Proc. Natl. Acad. Sci. U.S.A. 88 (1991) 492–496.
- [2] M. Czapla, E. Cieluch, A. Borek, M. Sarewicz, A. Osyczka, Catalytically-relevant electron transfer between two hemes *b*<sub>L</sub> in the hybrid cytochrome *bc*<sub>1</sub>-like complex containing a fusion of *Rhodobacter sphaeroides* and *capsulatus* cytochromes *b*, Biochim. Biophys. Acta. 1827 (2013) 751–760.
